# Supplementary material for: Sulfur Doping versus Hierarchical Pore Structure: The Dominating Effect on the Fe–N–C Site Density, Activity, and Selectivity in Oxygen Reduction Reaction Electrocatalysis
Source: PubMed Central journal article supplement (PMC8447183; doi:10.1021/acsami.1c09659), 2021-09-01
Supplement: am1c09659_si_001.pdf [file am1c09659_si_001.pdf]

## Supporting Information

### **Sulfur Doping versus hierarchical pore structure: the dominating effect on the Fe-N-C site density, activity and selectivity in Oxygen Reduction Reaction electrocatalysis**

*Giorgia Daniel, Marco Mazzucato, Riccardo Brandiele, Laura de Lazzari, Denis Badocco, Paolo Pastore, Tomasz Kosmala, Gaetano Granozzi, and Christian Durante\**

Department of Chemical Sciences, University of Padova, via Marzolo 1, 35131, Padova, Italy.

|    |                    |            |
|----|--------------------|------------|
| S1 | Supporting Figures | pag. S2-S3 |
| S2 | Supporting Tables  | pag. S4-S5 |

**S1 Supporting Figures**

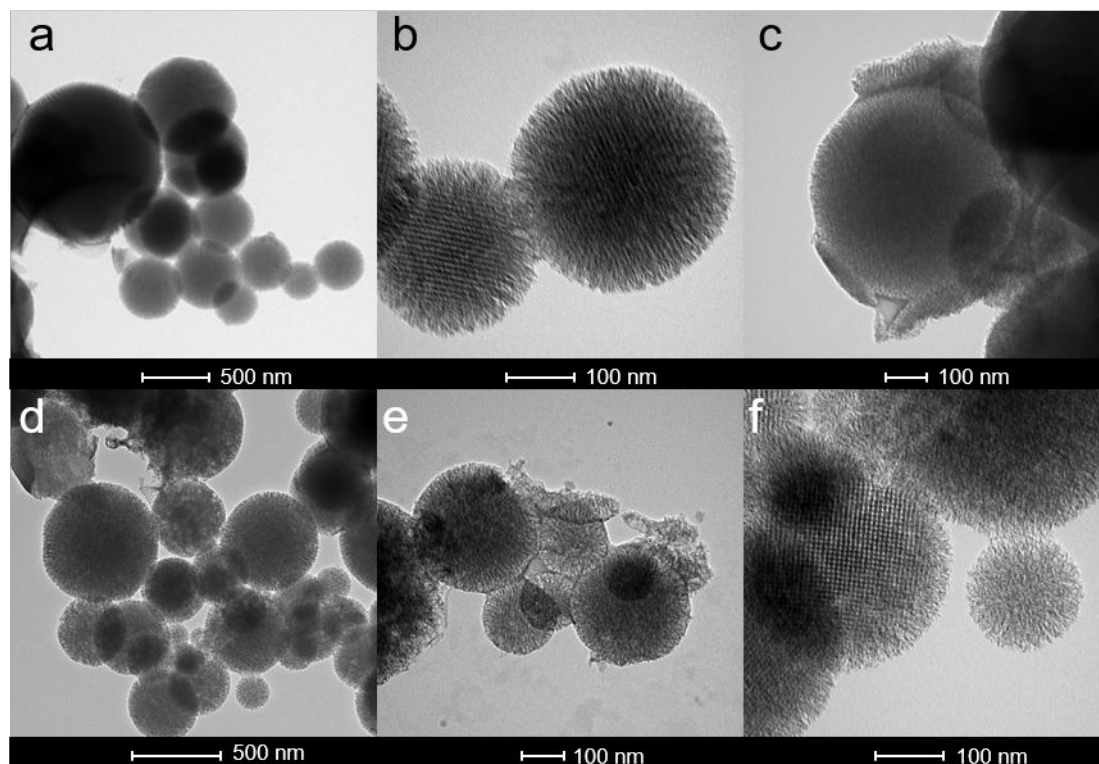

Figure S1: TEM image of (a-c) SMC100, (d-f) SMCS<sub>t</sub>60

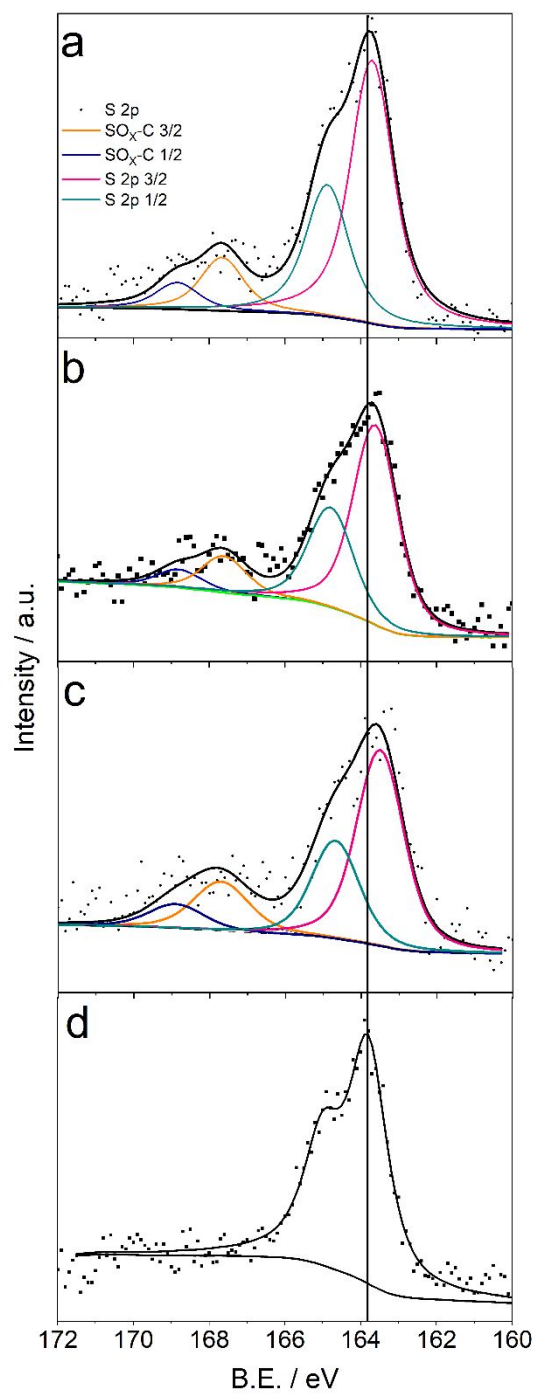

Figure S2: XPS spectra analysis of S 2p components of investigated catalysts (a) FeSMC, (b) FeSMC30, (c) FeSMC50, and (d) SMC.

## S2 Supporting Tables

Table S1: Raman deconvolution parameter

|                  | $A_G$<br>cm <sup>-1</sup> | $A_{D3}$<br>cm <sup>-1</sup> | $D1$<br>cm <sup>-1</sup> | $G$<br>cm <sup>-1</sup> | $I_{D1}$<br>a.u. | $I_G$<br>a.u. | $I_{D1}/I_G$<br>- | $A_{D1}/A_G$<br>- | $R_2$<br>- |
|------------------|---------------------------|------------------------------|--------------------------|-------------------------|------------------|---------------|-------------------|-------------------|------------|
| <b>FeSMC</b>     | 59.13                     | 81.64                        | 1333                     | 1597                    | 0.84             | 0.73          | 1.14              | 2.05              | 0.62       |
| <b>FeSMC70</b>   | 53.57                     | 104.30                       | 1332                     | 1599                    | 0.76             | 0.69          | 1.11              | 2.08              | 0.55       |
| <b>FeSMC50</b>   | 51.58                     | 107.06                       | 1328                     | 1595                    | 0.79             | 0.70          | 1.12              | 2.13              | 0.65       |
| <b>FeSMC30</b>   | 61.33                     | 104.78                       | 1334                     | 1600                    | 0.83             | 0.76          | 1.10              | 1.96              | 0.65       |
| <b>FeMC</b>      | 44.70                     | 136.69                       | 1328                     | 1594                    | 0.65             | 0.63          | 1.04              | 1.89              | 0.65       |
| <b>FeSMCSt5</b>  | 53.25                     | 79.38                        | 1330                     | 1596                    | 0.82             | 0.74          | 1.11              | 2.10              | 0.57       |
| <b>FeSMCSt20</b> | 53.31                     | 78.83                        | 1330                     | 1598                    | 0.86             | 0.78          | 1.10              | 2.12              | 0.64       |
| <b>FeSMCSt40</b> | 54.12                     | 80.84                        | 1331                     | 1597                    | 0.89             | 0.77          | 1.15              | 2.21              | 0.62       |
| <b>FeSMCSt60</b> | 49.92                     | 72.38                        | 1327                     | 1596                    | 0.84             | 0.76          | 1.11              | 2.13              | 0.64       |

Table S2: Surface composition and differentiation derived from XPS analysis

|                  | Fe<br>wt. % | N<br>wt. % | S<br>wt. % | N <sub>x</sub><br>% | N <sub>pyrid</sub><br>% | N <sub>graf</sub><br>% | N <sub>pyrro</sub><br>% | C-S-C<br>% | C-SO-C<br>% | SO <sub>x</sub><br>% | SO <sub>x</sub> /<br>C-S-C | r <sup>a</sup><br>- |
|------------------|-------------|------------|------------|---------------------|-------------------------|------------------------|-------------------------|------------|-------------|----------------------|----------------------------|---------------------|
| <b>FeSMC</b>     | 0.85        | 1.36       | 2.45       | 14.5                | 23.7                    | 12.7                   | 32.1                    | 79.3       | 1.8         | 18.9                 | 0.24                       | 4.0                 |
| <b>FeSMC70</b>   | 0.74        | 1.34       | 2.04       | 14.5                | 23.6                    | 12.7                   | 32.1                    | 78.1       | 5.3         | 16.6                 | 0.21                       | 3.8                 |
| <b>FeSMC50</b>   | 0.53        | 1.06       | 0.79       | 19.9                | 20.3                    | 11.8                   | 31.3                    | 73.7       | 4.2         | 22.1                 | 0.30                       | 1.9                 |
| <b>FeSMC30</b>   | 0.67        | 1.18       | 0.82       | 13.4                | 25.8                    | 12.5                   | 33.0                    | 76.2       | 4.4         | 19.4                 | 0.25                       | 1.6                 |
| <b>FeMC</b>      | 0.72        | 1.02       | 0.26       | 15.7                | 19.9                    | 13.6                   | 31.6                    | 64.9       | 0.0         | 35.1                 | 0.54                       | 0.4                 |
| <b>FeSMCSt5</b>  | 0.23        | 0.94       | 0.39       | 23.4                | 14.9                    | 14.3                   | 26.8                    | 80.1       | -           | 19.9                 | 0.25                       | 2.4                 |
| <b>FeSMCSt20</b> | 0.36        | 0.80       | 0.54       | 20.3                | 20.4                    | 11.8                   | 31.8                    | 82.9       | 5.8         | 11.3                 | 0.14                       | 2.2                 |
| <b>FeSMCSt40</b> | 0.36        | 0.84       | 0.34       | 25.1                | 21.0                    | 12.2                   | 22.2                    | 82.9       | 5.8         | 11.3                 | 0.14                       | 1.3                 |
| <b>FeSMCSt60</b> | 0.23        | 0.65       | 0.39       | 13.3                | 26.6                    | 8.7                    | 29.3                    | 65.1       | -           | 34.9                 | 0.54                       | 2.0                 |

<sup>a</sup> C-S-C/Fe

Table S3: Electrochemical parameter derived from RRDE analysis at 1600 rpm 1 mV s<sup>-1</sup> in 0.5M H<sub>2</sub>SO<sub>4</sub>

|                  | $E_{1/2}$<br>V | $j_1^{0V}$<br>mA cm <sup>-2</sup> | $j^{0.8V}$<br>mA cm <sup>-2</sup> | $j^{0.85V}$<br>mA cm <sup>-2</sup> | $j_k^{0.8V}$<br>A g <sup>-1</sup> | $j_k^{0.85V}$<br>A g <sup>-1</sup> | $n$<br># | $H_2O_2$<br>% <sup>0.7V</sup> % <sup>0.2V</sup> |     |
|------------------|----------------|-----------------------------------|-----------------------------------|------------------------------------|-----------------------------------|------------------------------------|----------|-------------------------------------------------|-----|
| <b>FeSMC</b>     | 0.725          | 4.37                              | 0.660                             | 0.162                              | 1.30                              | 0.28                               | 3.97     | 3.5                                             | 1.9 |
| <b>FeSMC70</b>   | 0.646          | 4.10                              | 0.348                             | 0.084                              | 0.63                              | 0.14                               | 3.92     | 8.4                                             | 5.9 |
| <b>FeSMC50</b>   | 0.695          | 4.94                              | 0.660                             | 0.182                              | 1.27                              | 0.31                               | 3.91     | 2.7                                             | 1.2 |
| <b>FeSMC30</b>   | 0.646          | 4.13                              | 0.165                             | 0.044                              | 0.29                              | 0.07                               | 3.98     | 5.2                                             | 5.2 |
| <b>FeMC</b>      | 0.717          | 4.35                              | 0.561                             | 0.127                              | 1.07                              | 0.22                               | 3.93     | 4.8                                             | 3.1 |
| <b>FeSMCSt5</b>  | 0.609          | 4.53                              | 0.134                             | 0.031                              | 0.23                              | 0.05                               | 3.91     | 7.4                                             | 5.7 |
| <b>FeSMCSt20</b> | 0.739          | 4.76                              | 0.840                             | 0.193                              | 1.70                              | 0.34                               | 3.95     | 2.6                                             | 4.1 |
| <b>FeSMCSt40</b> | 0.717          | 4.77                              | 0.691                             | 0.161                              | 1.35                              | 0.28                               | 3.92     | 5.6                                             | 4.5 |
| <b>FeSMCSt60</b> | 0.731          | 4.97                              | 0.660                             | 0.147                              | 1.27                              | 0.25                               | 3.93     | 4.4                                             | 4.3 |

Table S4: Stripping data and utilization factor ( $\Phi$ ) calculated from bulk Fe (ICP)

|                  | <b><i>SD</i></b>                       | <b><i>SD<sub>BET</sub></i></b>         | <b><i>TOF<sup>0.8V</sup></i></b> | <b><i>TOF<sup>0.85V</sup></i></b> | <b><i>SD<sub>MAX,ICP</sub></i></b>     | <b><math>\Phi</math></b> |
|------------------|----------------------------------------|----------------------------------------|----------------------------------|-----------------------------------|----------------------------------------|--------------------------|
|                  | 10 <sup>18</sup> sites g <sup>-1</sup> | 10 <sup>15</sup> sites m <sup>-2</sup> | s <sup>-1</sup>                  | s <sup>-1</sup>                   | 10 <sup>19</sup> sites g <sup>-1</sup> | %                        |
| <b>FeSMC</b>     | 7.51                                   | 5.80                                   | 1.47                             | 0.50                              | 4.31                                   | 17.4                     |
| <b>FeSMC70</b>   | 5.54                                   | 5.24                                   | 1.19                             | 0.33                              | 7.33                                   | 7.6                      |
| <b>FeSMC50</b>   | 9.25                                   | 9.33                                   | 2.10                             | 0.73                              | 8.63                                   | 10.7                     |
| <b>FeSMC30</b>   | 8.75                                   | 11.8                                   | 0.28                             | -                                 | 11.8                                   | 7.4                      |
| <b>FeMC</b>      | 5.71                                   | 4.47                                   | 1.68                             | 0.44                              | 12.6                                   | 4.5                      |
| <b>FeSMCSt5</b>  | 5.54                                   | 4.65                                   | 1.04                             | 0.34                              | 2.70                                   | 20.5                     |
| <b>FeSMCSt20</b> | 5.22                                   | 3.34                                   | 3.40                             | 0.97                              | 11.1                                   | 4.7                      |
| <b>FeSMCSt40</b> | 8.56                                   | 6.22                                   | 1.58                             | 0.38                              | 11.1                                   | 7.7                      |
| <b>FeSMCSt60</b> | 5.87                                   | 3.40                                   | 3.41                             | 0.87                              | 9.38                                   | 6.3                      |
